# Supplementary material
Source: HighWire-hosted journal article supplement (https://cmaj.ca/highwire/filestream/69989/field_highwire_adjunct_files/2/170871-res-3-at.pdf)
Supplement: 170871-res-3-at.pdf [file 170871-res-3-at.pdf]

**Appendix 3 (as supplied by the authors)**

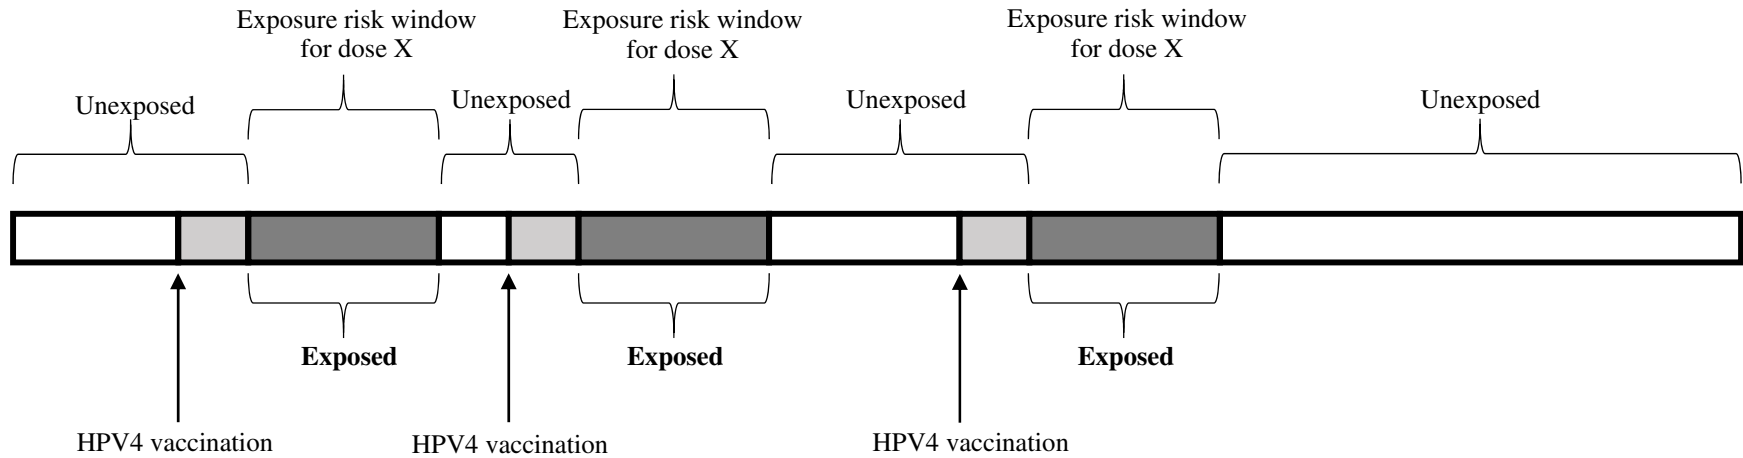

- Unexposed person-time, where the occurrence of an event would not be attributable to the HPV4 vaccine
- Unexposed person-time to account for the time it takes for symptoms to develop
- Exposed person-time where events occurring during this time period are attributable to the effects of HPV4 vaccine
